# Supplementary material for: Convenient synthesis and engineering of ultrafine Co3O4-incorporated carbon composite: towards practical application of environmental remediation
Source: Royal Society of Chemistry journal article supplement (doi:10.1039/c7ta11052a), 2018-01-01
Supplement: c7ta11052a1.pdf [file c7ta11052a1.pdf]

**Convenient synthesis and engineering of ultrafine Co<sub>3</sub>O<sub>4</sub>-incorporated carbon composite:  
towards practical application of environmental remediation**

Rui Luo, Chao Liu, Jiansheng Li\*, Chaohai Wang, Xiuyun Sun, Jinyou Shen, Weiqing Han, Lianjun Wang\*

Key Laboratory of Jiangsu Province for Chemical Pollution Control and Resources Reuse

School of Environment and Biological Engineering

Nanjing University of Science and Technology, Nanjing 210094, China.

Tel: +(86) 025-84315351

\*E-mail:

lijsh@mail.njust.edu.cn;

wanglj@mail.njust.edu.cn.

## Electronic Supplementary Material

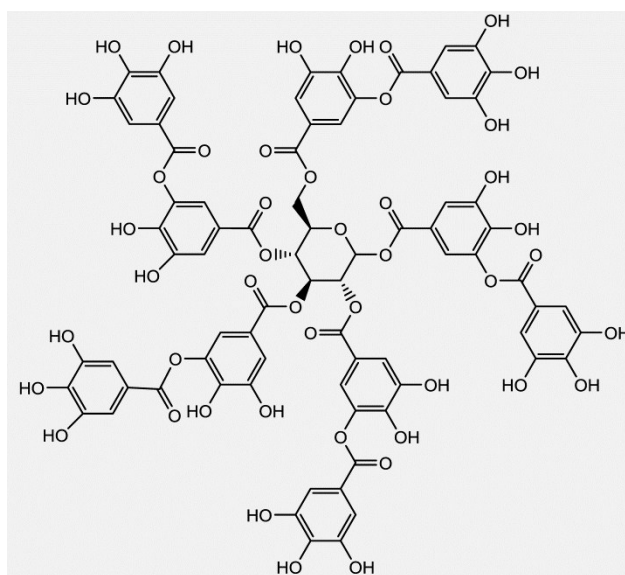

Fig. S1 The chemical structure of TA

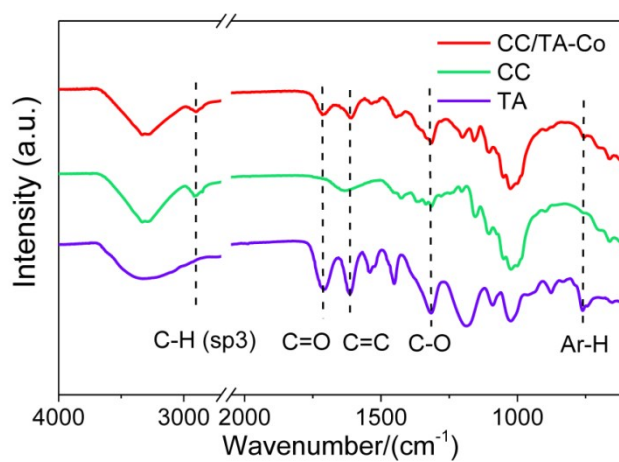

Fig. S2 The FT-IR spectra of TA, CC and CC/TA-Co.

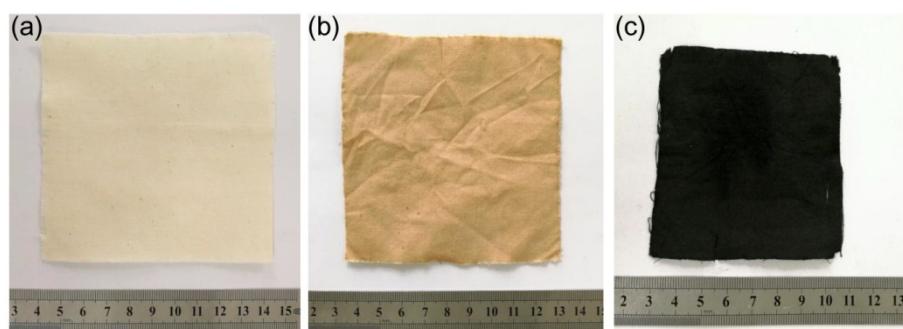

Fig. S3 The pictures of (a) CC, (b) CC/TA-Co and (c)  $\text{Co}_3\text{O}_4/\text{CC}$

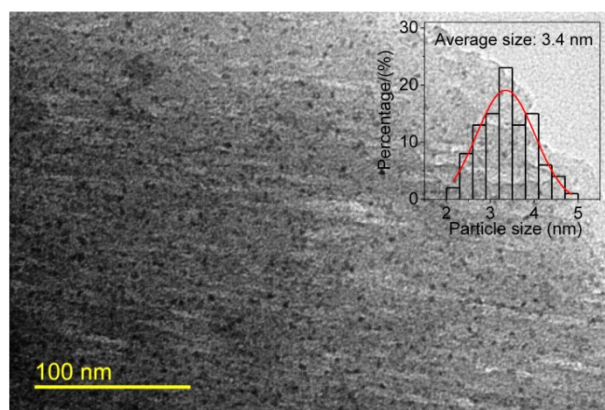

Fig. S4 The TEM image and size distribution profile of Co/CC

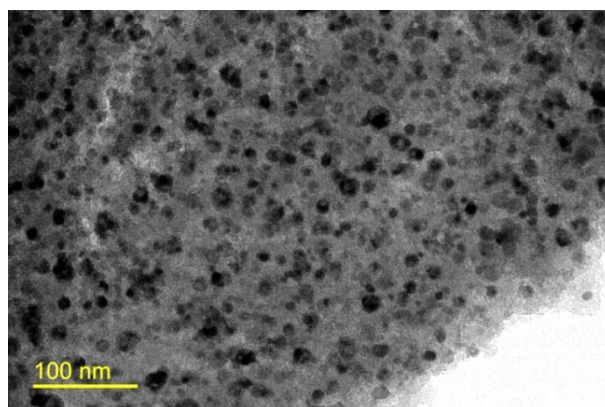

Fig. S5 The TEM image of  $\text{Co}_3\text{O}_4\text{-C}$

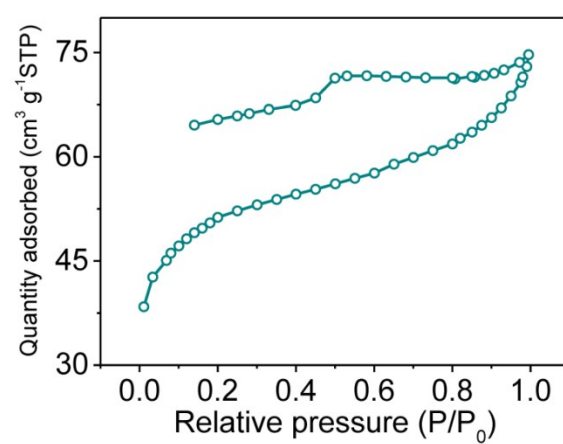

Fig. S6  $\text{N}_2$  adsorption-desorption isotherms of  $\text{Co}_3\text{O}_4/\text{CC}$ .

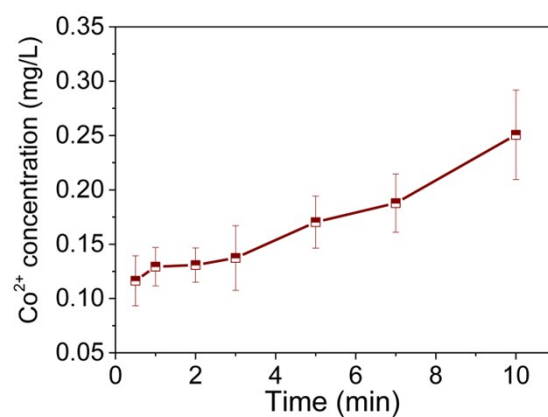

Fig. S7 The  $\text{Co}^{2+}$  leaching of  $\text{Co}_3\text{O}_4/\text{CC}$  in the degradation process

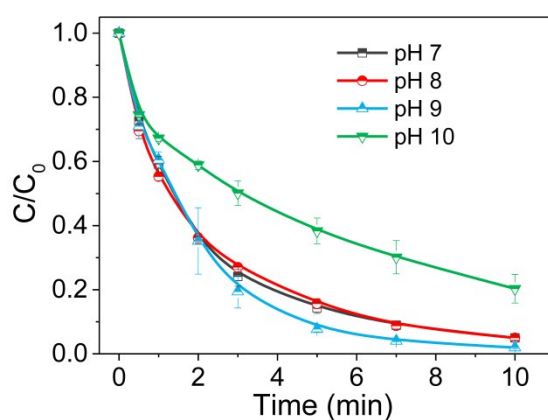

Fig. S8 The effect of initial solution pH on BPA removal efficiency

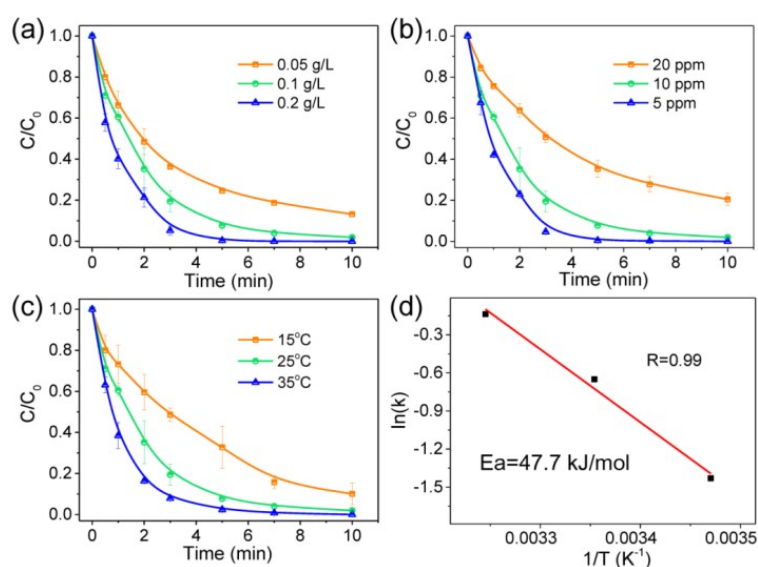

Fig. S9 Efforts of (a) PMS dose, (b) BPA concentration and (c) reaction temperature on BPA removal efficiency. Reaction conditions:  $[\text{BPA}] = 10 \text{ mg/L}$  (for a, c),  $[\text{PMS}] = 0.1 \text{ g/L}$  (for b, c), catalyst =  $0.1 \text{ g/L}$ , initial pH = 9.0,  $T = 298 \text{ K}$  (for a, b), (d) the estimation of activation energy.

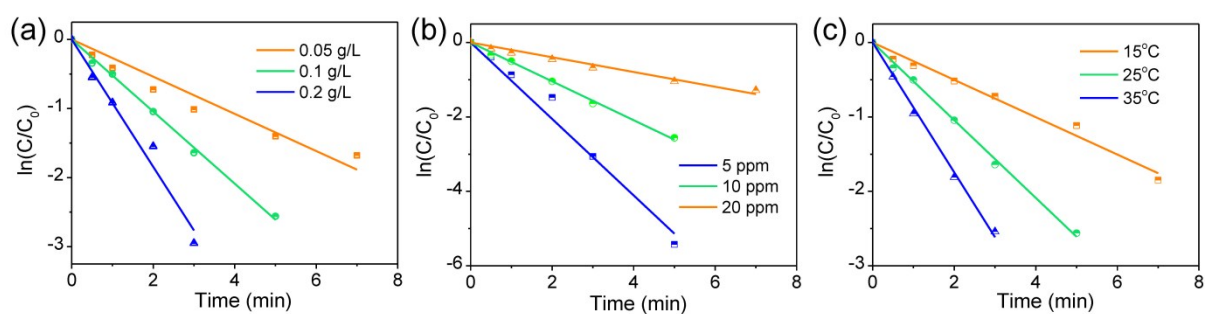

Fig. S10. Effects of (a) PMS dose, (d) BPA concentration and (c) reaction temperature on BPA removal efficiency.

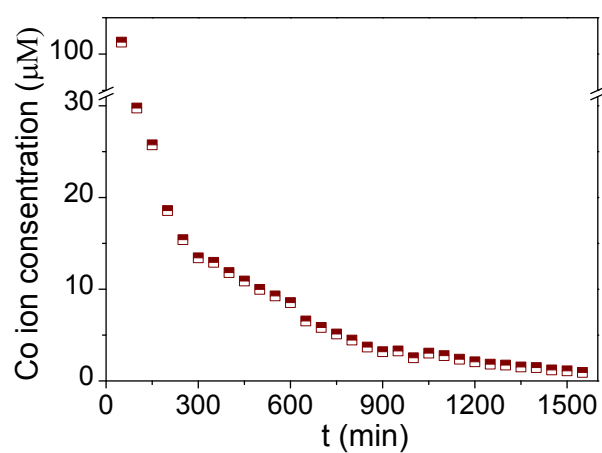

Fig. S11 The change of concentration of  $\text{Co}^{2+}$  varying with BPA solution volume

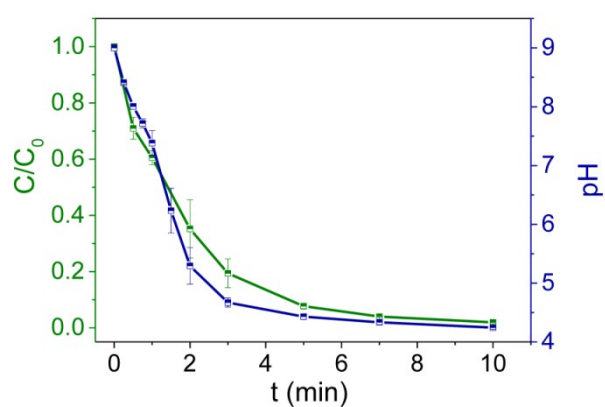

Fig. S12 The relationship between the removal efficiency of BPA and pH of solution.

Table S1 The main aromatic intermediates from BPA degradation

| Compound                                                                                                                 | Molecular weight (m/z) | Tentative structure                                                                      |
|--------------------------------------------------------------------------------------------------------------------------|------------------------|------------------------------------------------------------------------------------------|
| Monohydroxylated BPA (MHBPA)                                                                                             | 244                    | 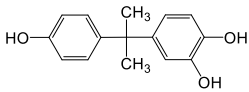       |
| Quinone of monohydroxylated BPA                                                                                          | 242                    |        |
| 2-Hydroxy-4-(2-(3-hydroxy-4-oxocyclohexa-2,5-dienyl)propan-2-yl)cyclohexa-2,5-dienone [or quinone of dihydroxylated BPA] | 256                    |        |
| Quinone of dihydroxylated BPA                                                                                            |                        | or<br> |
| Biphenyldiol                                                                                                             | 186                    |        |
